# Supplementary material for: East Antarctic Ice Sheet variability in the central Transantarctic Mountains since the mid Miocene
Source: Copernicus journal article supplement (doi:10.5194/cp-21-145-2025), 2025-01-21
Supplement: Supplementary file 1 [file cp-21-145-2025-supplement.zip]

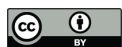

*Supplement of*

**East Antarctic Ice Sheet variability in the central  
Transantarctic Mountains since the mid Miocene**

**Gordon R. M. Bromley et al.**

*Correspondence to:* Gordon R. M. Bromley ([gordon.bromley@universityofgalway.ie](mailto:gordon.bromley@universityofgalway.ie))

- [cp-21-145-2025-supplement-title-page.pdf](#)
- [Table S1.xlsx](#)
- [Table S2.xlsx](#)
- [Table S3.xlsx](#)
- [Table S4.xlsx](#)

The copyright of individual parts of the supplement might differ from the article licence.
