# Supplementary material for: East Antarctic Ice Sheet variability in the central Transantarctic Mountains since the mid Miocene
Source: Copernicus journal article supplement (doi:10.5194/cp-21-145-2025), 2025-01-21
Supplement: Supplementary file 1 [file cp-21-145-2025-supplement.zip]

## Sheet: Sheet1
Table S2. Step-degassing He analyses for pyroxenes from dolerite erratics at Otway Massif.
Sample ID		Aliquot	Heating temperature (°C)	Heating time (min)	Aliquot weight (g)	[He-3] (atoms/g)	δ[He-3] (atoms/g)	[He-3] (atoms/g)	δ[He-3] (atoms/g)	% error	[He-4] (atoms/g)	δ[He-4] (atoms/g)	[He-4] (atoms/g)	δ[He-4] (atoms/g)
15-OTW-001-MOG	2017_09_1	a	1225	15	0.02575	4.09899e+09	1.18989e+08	4.13926e+09	1.19006e+08	2.87505	8.85928e+13	1.14436e+12	8.94455e+13	1.14621e+12
15-OTW-001-MOG	2017_09_1	a	1325	15	0.02575	4.02665e+07	1.97649e+06				8.52642e+11	6.50342e+10
15-OTW-002-MOG	2017_09_1	a	1225	15	0.02508	1.09291e+09	3.29212e+07	1.11396e+09	3.29589e+07	2.95871	1.62931e+14	2.11174e+12	1.65761e+14	2.11363e+12
15-OTW-002-MOG	2017_09_1	a	1325	15	0.02508	2.10516e+07	1.57541e+06				2.83053e+12	8.92543e+10
15-OTW-002-MOG	2017_09_4	b	1225	15	0.03811	1.1229e+09	4.19662e+07	1.13139e+09	4.19759e+07	3.71011	1.75753e+14	1.58154e+12	1.76824e+14	1.58205e+12
15-OTW-002-MOG	2017_09_4	b	1325	15	0.03811	8.49812e+06	904067				1.07133e+12	4.02843e+10
15-OTW-003-MOG	2017_09_1	a	1225	15	0.02728	2.38768e+09	6.96059e+07	2.4013e+09	6.96179e+07	2.89917	7.87328e+13	1.01514e+12	7.91967e+13	1.01621e+12
15-OTW-003-MOG	2017_09_1	a	1325	15	0.02728	1.36269e+07	1.28932e+06				4.63956e+11	4.66102e+10
15-OTW-003-MOG	2017_09_3	b	1225	15	0.03651	2.39979e+09	6.99847e+07	2.41749e+09	6.99962e+07	2.89541	7.65901e+13	6.31609e+11	7.71129e+13	6.32767e+11
15-OTW-003-MOG	2017_09_3	b	1325	15	0.03651	1.77013e+07	1.26796e+06				5.22773e+11	3.82619e+10
15-OTW-004-MOG	2017_09_1	a	1225	15	0.02787	3.23524e+09	9.41417e+07	3.31773e+09	9.41884e+07	2.83894	1.68477e+14	2.16611e+12	1.7277e+14	2.16999e+12
15-OTW-004-MOG	2017_09_1	a	1325	15	0.02787	8.24822e+07	2.96296e+06				4.29342e+12	1.29743e+11
15-OTW-005-MOG	2017_09_1	a	1225	15	0.02785	1.87047e+09	5.48185e+07	1.88084e+09	5.48319e+07	2.91529	9.15655e+13	1.18081e+12	9.19574e+13	1.1818e+12
15-OTW-005-MOG	2017_09_1	a	1325	15	0.02785	1.03718e+07	1.21323e+06				3.91856e+11	4.82659e+10
15-OTW-006-MOG	2018_08_29	a	1225	15	0.02972	1.42944e+09	4.95427e+07	1.45258e+09	4.95646e+07	3.41217	3.3183e+14	2.07475e+13	3.35241e+14	2.07481e+13
15-OTW-006-MOG	2018_08_29	a	1325	15	0.02972	2.31392e+07	1.47378e+06				3.41163e+12	1.59223e+11
15-OTW-007-MOG	2018_08_29	a	1225	15	0.03417	2.74104e+09	9.04936e+07	2.75647e+09	9.05003e+07	3.28319	4.53293e+13	2.38215e+12	4.55532e+13	2.38245e+12
15-OTW-007-MOG	2018_08_29	a	1325	15	0.03417	1.54321e+07	1.1022e+06				2.23834e+11	3.8352e+10
15-OTW-007-MOG	2019_01_10	b	1225	15	0.05636	2.59462e+09	1.22007e+08	2.61896e+09	1.22016e+08	4.65896	4.20094e+13	1.27721e+12	4.2537e+13	1.27741e+12
15-OTW-007-MOG	2019_01_10	b	1325	15	0.05636	2.43418e+07	1.49843e+06				5.27538e+11	2.26534e+10
15-OTW-008-MOG	2018_09_05	a	1225	15	0.03258	1.75904e+09	5.80362e+07	1.77461e+09	5.80463e+07	3.27094	9.46397e+13	4.31607e+12	9.55176e+13	4.31633e+12
15-OTW-008-MOG	2018_09_05	a	1325	15	0.03258	1.55716e+07	1.08318e+06				8.77869e+11	4.78294e+10
15-OTW-009-MOG	2018_09_05	a	1225	15	0.03408	2.4111e+09	7.9326e+07	2.43566e+09	7.9338e+07	3.25735	5.65508e+13	2.6324e+12	5.70742e+13	2.63263e+12
15-OTW-009-MOG	2018_09_05	a	1325	15	0.03408	2.45656e+07	1.37877e+06				5.23394e+11	3.47248e+10
15-OTW-009-MOG	2019_01_16	c	1225	15	0.05138	2.32517e+09	1.10708e+08	2.34264e+09	1.10716e+08	4.72609	3.50545e+10	1.18126e+10
15-OTW-009-MOG	2019_01_16	c	1325	15	0.05138	1.74743e+07	1.30763e+06				5.4963e+13	1.80399e+12	5.52658e+13	1.80412e+12
15-OTW-010-MOG	2017_09_1	a	1225	15	0.02721	1.08131e+09	3.24412e+07	1.09159e+09	3.24604e+07	2.97368	1.04154e+14	1.34174e+12	1.04876e+14	1.34248e+12
15-OTW-010-MOG	2017_09_1	a	1325	15	0.02721	1.02834e+07	1.11365e+06				7.22248e+11	4.46155e+10
15-OTW-014-DUT	2017_09_1	a	1225	15	0.02511	1.6469e+09	4.84437e+07	1.66006e+09	4.8461e+07	2.91922	1.33305e+14	1.71534e+12	1.34243e+14	1.71612e+12
15-OTW-014-DUT	2017_09_1	a	1325	15	0.02511	1.31641e+07	1.29484e+06				9.37809e+11	5.17296e+10
15-OTW-014-DUT	2017_09_4	b	1225	15	0.02268	1.66946e+09	6.21962e+07	1.67715e+09	6.22132e+07	3.70946	1.32097e+14	1.19156e+12	1.32511e+14	1.19277e+12
15-OTW-014-DUT	2017_09_4	b	1325	15	0.02268	7.68571e+06	1.45142e+06				4.14641e+11	5.37294e+10
15-OTW-015-DUT	2017_09_1	a	1225	15	0.02787	1.86749e+09	5.60469e+07	1.8793e+09	5.60609e+07	2.98308	5.6757e+13	2.37189e+12	5.70729e+13	2.37245e+12
15-OTW-015-DUT	2017_09_1	a	1325	15	0.02787	1.18063e+07	1.25425e+06				3.15886e+11	5.16506e+10
15-OTW-016-DUT	2017_09_4	a	1225	15	0.02362	3.94365e+09	1.45292e+08	3.95853e+09	1.453e+08	3.67055	129310162689444	1.16479e+12	1.29936e+14	1.16711e+12
15-OTW-016-DUT	2017_09_4	a	1325	15	0.02362	1.48855e+07	1.48492e+06				6.25392e+11	7.34994e+10
15-OTW-016-DUT	2017_09_4	b	1225	15	0.01669	3.95276e+09	1.45796e+08	3.96739e+09	1.45808e+08	3.67517	1.23251e+14	1.11502e+12	1.23709e+14	1.11931e+12
15-OTW-016-DUT	2017_09_4	b	1325	15	0.01669	1.46277e+07	1.89803e+06				4.58361e+11	9.79095e+10
15-OTW-017-DUT	2017_09_1	a	1225	15	0.02447	3.11607e+09	9.33388e+07	3.14081e+09	9.33545e+07	2.97231	6.42522e+13	2.68437e+12	6.46647e+13	2.68491e+12
15-OTW-017-DUT	2017_09_1	a	1325	15	0.02447	2.4738e+07	1.71499e+06				4.12556e+11	5.38889e+10
15-OTW-018-DUT	2017_09_1	a	1225	15	0.02453	5.43212e+09	1.57615e+08	5.47939e+09	1.57631e+08	2.8768	1.05553e+14	1.35965e+12	1.06989e+14	1.36123e+12
15-OTW-018-DUT	2017_09_1	a	1325	15	0.02453	4.7266e+07	2.2181e+06				1.43559e+12	6.5565e+10
15-OTW-019-DUT	2017_09_1	a	1225	15	0.02712	5.30372e+09	1.53397e+08	5.34718e+09	1.53412e+08	2.86902	1.80241e+14	2.31929e+12	1.81519e+14	2.32036e+12
15-OTW-019-DUT	2017_09_1	a	1325	15	0.02712	4.3456e+07	2.14463e+06				1.27785e+12	7.04875e+10
15-OTW-020-DUT	2017_09_2	a	1225	15	0.02621	3.48184e+09	9.05425e+07	3.48954e+09	9.05487e+07	2.59486	8.70006e+13	6.94807e+11	8.71168e+13	6.9707e+11
15-OTW-020-DUT	2017_09_2	a	1325	15	0.02621	7.69646e+06	1.05841e+06				1.16276e+11	5.61231e+10
15-OTW-021-DUT	2017_09_2	a	1225	15	0.02901	4.10356e+09	1.06378e+08	4.128e+09	1.06388e+08	2.57722	9.60322e+13	7.60951e+11	9.62327e+13	7.63886e+11
15-OTW-021-DUT	2017_09_2	a	1325	15	0.02901	2.44414e+07	1.47532e+06				2.00556e+11	6.68967e+10
15-OTW-021-DUT	2017_09_4	b	1225	15	0.02903	4.0405e+09	1.48724e+08	4.07049e+09	1.48734e+08	3.65396	1.05084e+14	9.49167e+11	1.05648e+14	9.49985e+11
15-OTW-021-DUT	2017_09_4	b	1325	15	0.02903	2.99886e+07	1.75552e+06				5.63442e+11	3.94317e+10
15-OTW-022-DUT	2017_09_5	a	1225	15	0.0271	1.94515e+09	6.29723e+07	1.95863e+09	6.29844e+07	3.21574	8.23739e+13	1.07845e+12	8.28679e+13	1.0805e+12
15-OTW-022-DUT	2017_09_5	a	1325	15	0.0271	1.34809e+07	1.23674e+06				4.93982e+11	6.64164e+10
15-OTW-023-JOS	2017_09_5	a	1225	15	0.02779	3.39885e+09	1.09043e+08	3.42519e+09	1.0906e+08	3.18405	1.01081e+14	1.33569e+12	1.01964e+14	1.33876e+12
15-OTW-023-JOS	2017_09_5	a	1325	15	0.02779	2.63394e+07	1.93448e+06				8.83043e+11	9.05515e+10
15-OTW-024-JOS	2018_09_05	a	1225	15	0.03033	3.20605e+09	1.06761e+08	3.26393e+09	1.06797e+08	3.27203	1.16834e+14	5.4267e+12	1.18858e+14	5.42759e+12
15-OTW-024-JOS	2018_09_05	a	1325	15	0.03033	5.78792e+07	2.77019e+06				2.02341e+12	9.85611e+10
15-OTW-024-JOS	2019_01_16	c	1225	15	0.02378	3.04633e+09	1.45204e+08	3.08528e+09	1.45231e+08	4.70722	3.02856e+11	2.20934e+10
15-OTW-024-JOS	2019_01_16	c	1325	15	0.02378	3.89526e+07	2.77594e+06				1.10162e+14	3.62423e+12	1.11376e+14	3.62466e+12
15-OTW-025-JOS	2017_09_2	a	1225	15	0.02464	2.29557e+09	6.5402e+07	2.31431e+09	6.54185e+07	2.8267	5.78249e+13	2.39362e+12	5.81994e+13	2.39415e+12
15-OTW-025-JOS	2017_09_2	a	1325	15	0.02464	1.87361e+07	1.46919e+06				3.74514e+11	5.03726e+10
15-OTW-026-JOS	2017_09_5	a	1225	15	0.02678	3.80059e+09	1.21695e+08	3.83237e+09	1.21713e+08	3.17592	8.73308e+13	1.15016e+12	8.7885e+13	1.15267e+12
15-OTW-026-JOS	2017_09_5	a	1325	15	0.02678	3.17776e+07	2.07631e+06				5.54241e+11	7.59643e+10
15-OTW-027-JOS	2017_09_5	a	1225	15	0.0259	4.47706e+09	1.45286e+08	4.56973e+09	1.45346e+08	3.18062	6.4416e+13	8.45705e+11	6.55473e+13	8.49135e+11
15-OTW-027-JOS	2017_09_5	a	1325	15	0.0259	9.26727e+07	4.1809e+06				1.13125e+12	7.6251e+10
15-OTW-028-JOS	2017_09_5	a	1225	15	0.02659	3.8143e+09	1.22276e+08	3.83445e+09	1.22286e+08	3.18914	8.61925e+13	1.18662e+12	8.66291e+13	1.18842e+12
15-OTW-028-JOS	2017_09_5	a	1325	15	0.02659	2.01423e+07	1.57935e+06				4.36585e+11	6.54108e+10
15-OTW-031-JOS	2017_09_2	a	1225	15	0.02595	2.98741e+09	7.76732e+07	3.01232e+09	7.76922e+07	2.57915	7.69774e+13	6.08949e+11	7.75227e+13	6.1154e+11
15-OTW-031-JOS	2017_09_2	a	1325	15	0.02595	2.49064e+07	1.71757e+06				5.45321e+11	5.62393e+10
15-OTW-032-JOS	2017_09_5	a	1225	15	0.03507	2.17443e+09	6.98066e+07	2.21689e+09	6.98395e+07	3.15034	5.31751e+13	7.07463e+11	5.4032e+13	7.08921e+11
15-OTW-032-JOS	2017_09_5	a	1325	15	0.03507	4.2456e+07	2.14351e+06				8.56893e+11	4.54363e+10
15-OTW-034-MON	2017_09_5	a	1225	15	0.02619	8.93949e+09	2.85263e+08	9.11559e+09	2.85353e+08	3.13038	6.58156e+13	8.64668e+11	6.74203e+13	8.65914e+11
15-OTW-034-MON	2017_09_5	a	1325	15	0.02619	1.76107e+08	7.18763e+06				1.60468e+12	4.6423e+10
15-OTW-035-MON	2017_09_5	a	1225	15	0.02588	8.47622e+09	2.70565e+08	8.52287e+09	2.70578e+08	3.17473	1.77833e+14	2.33046e+12	178441856449131	2.33186e+12
15-OTW-035-MON	2017_09_5	a	1325	15	0.02588	4.66458e+07	2.63293e+06				6.08464e+11	8.06693e+10
15-OTW-036-MON	2017_09_5	a	1225	15	0.0336	2.31468e+09	7.44304e+07	2.35162e+09	7.44552e+07	3.16612	7.24541e+13	9.58353e+11	7.34119e+13	9.59343e+11
15-OTW-036-MON	2017_09_5	a	1325	15	0.0336	3.69472e+07	1.92258e+06				9.5779e+11	4.35592e+10
15-OTW-037-MON	2017_09_5	a	1225	15	0.02637	3.33013e+09	1.06642e+08	3.36334e+09	1.0666e+08	3.17125	3.52155e+13	4.62578e+11	3.55088e+13	4.69997e+11
15-OTW-037-MON	2017_09_5	a	1325	15	0.02637	3.32099e+07	1.92652e+06				2.93322e+11	8.31796e+10
15-OTW-037-MON	2017_09_5	b	1225	15	0.02896	3.27999e+09	1.05114e+08	3.3015e+09	1.05125e+08	3.18416	3.54486e+13	5.64866e+11	3.57722e+13	5.67887e+11
15-OTW-037-MON	2017_09_5	b	1325	15	0.02896	2.15026e+07	1.54688e+06				3.23577e+11	5.85027e+10
15-OTW-038-MON	2017_09_5	a	1225	15	0.01234	3.22071e+09	1.0489e+08	3.22588e+09	1.04906e+08	3.252	2.08279e+13	2.96091e+11	2.0941e+13	3.29327e+11
15-OTW-038-MON	2017_09_5	a	1325	15	0.01234	5.17646e+06	1.85281e+06				1.13071e+11	1.44173e+11
15-OTW-039-MON	2018_04_19	a	1225	15	0.03388	6.85654e+09	1.56119e+08	6.91491e+09	1.56135e+08	2.25795	1.47394e+14	1.38078e+12	1.48251e+14	1.38105e+12
15-OTW-039-MON	2018_04_19	a	1325	15	0.03388	5.83703e+07	2.29178e+06				8.57293e+11	2.76669e+10
15-OTW-040-MON	2018_09_05	a	1225	15	0.02893	2.59772e+09	8.98446e+07	2.62359e+09	8.9857e+07	3.42496	1.08956e+14	4.95631e+12	1.10118e+14	4.95688e+12
15-OTW-040-MON	2018_09_05	a	1325	15	0.02893	2.58711e+07	1.49184e+06				1.16168e+12	7.48685e+10
15-OTW-040-MON	2019_01_16	c	1225	15	0.02476	2.49919e+09	1.19237e+08	2.5045e+09	1.19243e+08	4.76115	1.21403e+12	5.57537e+10
15-OTW-040-MON	2019_01_16	c	1325	15	0.02476	5.3039e+06	1.23027e+06				1.11177e+14	3.65111e+12	1.11328e+14	3.65134e+12
15-OTW-043-CHA	2017_09_1	a	1225	15	0.02523	8.07171e+09	2.33089e+08	8.07716e+09	2.33091e+08	2.88581	7.76669e+13	1.00177e+12	7.78956e+13	1.00305e+12
15-OTW-043-CHA	2017_09_1	a	1325	15	0.02523	5.45562e+06	943862				2.28645e+11	5.06959e+10
15-OTW-044-CHA	2017_09_1	a	1225	15	0.03183	9.97023e+09	2.89551e+08	1.02511e+10	2.89655e+08	2.8256	1.08428e+14	1.39552e+12	1.10926e+14	1.39807e+12
15-OTW-044-CHA	2017_09_1	a	1325	15	0.03183	2.8088e+08	7.78422e+06				2.49807e+12	8.43986e+10
15-OTW-045-CHA	2017_09_1	a	1225	15	0.0259	8.04024e+09	2.31708e+08	8.12869e+09	2.31731e+08	2.85078	2.00012e+14	2.58489e+12	2.03597e+14	2.58782e+12
15-OTW-045-CHA	2017_09_1	a	1325	15	0.0259	8.84456e+07	3.26013e+06				3.58529e+12	1.23187e+11
15-OTW-045-CHA	2017_09_4	b	1225	15	0.02482	8.16417e+09	2.99435e+08	8.2276e+09	2.9945e+08	3.63958	1.97354e+14	1.77614e+12	1.99047e+14	1.77743e+12
15-OTW-045-CHA	2017_09_4	b	1325	15	0.02482	6.34268e+07	3.06615e+06				1.69351e+12	6.74761e+10
15-OTW-046-CHA	2017_09_1	a	1225	15	0.02514	9.17774e+09	2.72167e+08	9.19587e+09	2.72171e+08	2.95971	7.24955e+13	3.02779e+12	7.27352e+13	3.02815e+12
15-OTW-046-CHA	2017_09_1	a	1325	15	0.02514	1.8124e+07	1.45719e+06				2.39738e+11	4.66655e+10
15-OTW-046-CHA	2017_09_5	b	1225	15	0.02534	8.87035e+09	2.82621e+08	8.88289e+09	2.82624e+08	3.18167	7.52511e+13	9.86627e+11	7.54383e+13	9.89964e+11
15-OTW-046-CHA	2017_09_5	b	1325	15	0.02534	1.2538e+07	1.47829e+06				1.8716e+11	8.12147e+10
15-OTW-047-CHA	2017_09_2	a	1225	15	0.02375	7.73338e+09	1.99281e+08	7.78848e+09	1.99299e+08	2.5589	1.05e+14	8.31577e+11	1.05912e+14	8.33278e+11
15-OTW-047-CHA	2017_09_2	a	1325	15	0.02375	5.51031e+07	2.66875e+06				9.12596e+11	5.32182e+10
15-OTW-048-CHA	2017_05_3	a	1275	15	0.02772	9.79286e+09	1.55657e+08	9.83803e+09	1.55673e+08	1.58236	9.36023e+13	1.41115e+12	9.41151e+13	1.41255e+12
15-OTW-048-CHA	2017_05_3	a	1350	15	0.02772	4.51764e+07	2.21208e+06				5.12823e+11	6.30284e+10
15-OTW-048-CHA	2017_05_6	b	1275	15	0.04826	9.58475e+09	1.42774e+08	9.60246e+09	1.42778e+08	1.48688	9.14234e+13	1.11006e+12	9.153e+13	1.1104e+12
15-OTW-048-CHA	2017_05_6	b	1350	15	0.04826	1.77143e+07	1.05365e+06				1.06672e+11	2.77668e+10
15-OTW-048-CHA	2017_09_5	d	1225	15	0.02545	9.85406e+09	3.13948e+08	9.87594e+09	3.13953e+08	3.17897	9.10457e+13	1.19167e+12	9.1255e+13	1.19461e+12
15-OTW-048-CHA	2017_09_5	d	1325	15	0.02545	2.18762e+07	1.76633e+06				2.09307e+11	8.37673e+10
15-OTW-049-CHA	2017_05_3	a	1275	15	0.01797	9.05779e+09	1.89321e+08	9.3735e+09	1.89522e+08	2.02189	1.17348e+14	2.43822e+12	1.22996e+14	2.44201e+12
15-OTW-049-CHA	2017_05_3	a	1350	15	0.01797	3.15706e+08	8.71698e+06				5.64818e+12	1.35926e+11
15-OTW-049-CHA	2017_09_1	c	1225	15	0.03001	9.24917e+09	2.66766e+08	9.64898e+09	2.66976e+08	2.76689	1.29903e+14	1.67935e+12	1.37588e+14	1.6921e+12
15-OTW-049-CHA	2017_09_1	c	1325	15	0.03001	3.99808e+08	1.05959e+07				7.68403e+12	2.0733e+11
15-OTW-049-CHA	2018_08_22	d	1225	15	0.03292	9.75528e+09	3.64079e+08	9.92828e+09	3.64154e+08	3.66785	1.39619e+14	4.95053e+12	1.4173e+14	4.95132e+12
15-OTW-049-CHA	2018_08_22	d	1325	15	0.03292	1.73003e+08	7.39351e+06				2.11155e+12	8.82098e+10
15-OTW-050-CHA	2017_05_3	a	1275	15	0.02391	1.09188e+10	2.26032e+08	1.10278e+10	2.26068e+08	2.04999	3.29577e+13	6.83889e+11	3.33511e+13	6.86335e+11
15-OTW-050-CHA	2017_05_3	a	1350	15	0.02391	1.08992e+08	4.08633e+06				3.93341e+11	5.78948e+10
15-OTW-050-CHA	2017_05_6	b	1275	15	0.07541	1.0591e+10	2.57383e+08	1.06567e+10	2.57392e+08	2.41532	3.23812e+13	6.96352e+11	3.25445e+13	6.96694e+11
15-OTW-050-CHA	2017_05_6	b	1350	15	0.07541	6.56688e+07	2.14415e+06				1.63353e+11	2.18427e+10
15-OTW-051-CHA	2017_05_3	a	1275	15	0.01973	9.22672e+09	1.91449e+08	9.33611e+09	1.91501e+08	2.05118	8.84531e+13	1.8269e+12	8.95805e+13	1.82865e+12
15-OTW-051-CHA	2017_05_3	a	1350	15	0.01973	1.09391e+08	4.46888e+06				1.12748e+12	7.99201e+10
15-OTW-051-CHA	2018_03_29	b	1225	15	0.04728	9.00985e+09	1.44124e+08	9.18789e+09	1.44171e+08	1.56914	8.5817e+13	2.22864e+12	8.75631e+13	2.22931e+12
15-OTW-051-CHA	2018_03_29	b	1325	15	0.04728	1.78038e+08	3.6711e+06				1.74608e+12	5.4785e+10
15-OTW-051-CHA	2018_04_17	c	1225	15	0.05143	9.09949e+09	2.05994e+08	9.27907e+09	2.06049e+08	2.22058	8.70139e+13	8.0135e+11	8.88613e+13	8.01811e+11
15-OTW-051-CHA	2018_04_17	c	1325	15	0.05143	1.79575e+08	4.77339e+06				1.84737e+12	2.7193e+10
15-OTW-051-CHA	2018_08_22	d	1225	15	0.03095	9.69162e+09	3.61647e+08	9.86923e+09	3.61722e+08	3.66515	8.60475e+13	3.05347e+12	87941707429706	3.05579e+12
15-OTW-051-CHA	2018_08_22	d	1325	15	0.03095	1.77611e+08	7.35111e+06				1.8942e+12	1.1892e+11
15-OTW-051-CHA	2019_01_10	e	1225	15	0.04072	8.73199e+09	4.09629e+08	8.88129e+09	4.09699e+08	4.61305	8.48548e+13	2.62989e+12	8.64676e+13	2.63042e+12
15-OTW-051-CHA	2019_01_10	e	1325	15	0.04072	1.49302e+08	7.54556e+06				1.61277e+12	5.28969e+10
15-OTW-052-CHA	2017_05_4	a	1275	15	0.02326	8.6869e+09	1.7346e+08	8.70953e+09	1.73469e+08	1.99172	7.15593e+13	1.62535e+12	7.18085e+13	1.62695e+12
15-OTW-052-CHA	2017_05_4	a	1350	15	0.02326	2.26278e+07	1.75835e+06				2.49235e+11	7.19583e+10
15-OTW-053-OLD	2017_05_4	a	1275	15	0.01973	1.11797e+10	2.22522e+08	1.12212e+10	2.22537e+08	1.98318	8.34536e+13	1.90124e+12	8.37118e+13	1.90309e+12
15-OTW-053-OLD	2017_05_4	a	1350	15	0.01973	4.15036e+07	2.56332e+06				2.58198e+11	8.40914e+10
15-OTW-054-OLD	2017_05_4	a	1275	15	0.02029	1.08407e+10	2.16062e+08	1.08603e+10	2.16071e+08	1.98954	7.57569e+13	1.72386e+12	7.59339e+13	1.72527e+12
15-OTW-054-OLD	2017_05_4	a	1350	15	0.02029	1.96814e+07	1.91774e+06				1.77054e+11	6.98642e+10
15-OTW-055-OLD	2017_05_4	a	1275	15	0.01772	1.09422e+10	2.17601e+08	1.09831e+10	2.17616e+08	1.98137	1.0487e+14	2.38364e+12	1.05413e+14	2.38524e+12
15-OTW-055-OLD	2017_05_4	a	1350	15	0.01772	4.08524e+07	2.5856e+06				5.4365e+11	8.73388e+10
15-OTW-055-OLD	2017_09_1	c	1225	15	0.0314	1.10467e+10	3.18047e+08	1.11621e+10	3.18067e+08	2.84953	1.05828e+14	1.36706e+12	1.07519e+14	1.3686e+12
15-OTW-055-OLD	2017_09_1	c	1325	15	0.0314	1.15366e+08	3.57108e+06				1.69184e+12	6.50259e+10
15-OTW-056-OLD	2017_05_4	a	1275	15	0.02132	1.0711e+10	2.13209e+08	1.07286e+10	2.13216e+08	1.98737	7.10993e+13	1.61692e+12	7.12718e+13	1.61914e+12
15-OTW-056-OLD	2017_05_4	a	1350	15	0.02132	1.75749e+07	1.74289e+06				1.7244e+11	8.47796e+10
15-OTW-056-OLD	2017_05_6	b	1275	15	0.04305	1.04407e+10	1.58182e+08	1.04525e+10	1.58185e+08	1.51336	7.06132e+13	8.65758e+11	7.06924e+13	8.66409e+11
15-OTW-056-OLD	2017_05_6	b	1350	15	0.04305	1.17999e+07	917478				7.92419e+10	3.35686e+10
15-OTW-056-OLD	2018_03_29	c	1225	15	0.05044	1.03597e+10	1.6508e+08	1.04528e+10	1.65095e+08	1.57944	6.85238e+13	1.85184e+12	6.93858e+13	1.85207e+12
15-OTW-056-OLD	2018_03_29	c	1325	15	0.05044	9.30822e+07	2.23134e+06				8.6196e+11	2.9151e+10
15-OTW-056-OLD	2018_04_17	d	1225	15	0.04111	1.04406e+10	2.36559e+08	1.04764e+10	2.36564e+08	2.25806	7.89859e+13	7.69755e+11	7.95907e+13	7.70148e+11
15-OTW-056-OLD	2018_04_17	d	1325	15	0.04111	3.58063e+07	1.48911e+06				6.04785e+11	2.46012e+10
15-OTW-057-OLD	2017_05_4	a	1275	15	0.02718	1.0943e+10	2.17365e+08	1.09824e+10	2.17376e+08	1.97932	5.67319e+13	1.28918e+12	5.71071e+13	1.28993e+12
15-OTW-057-OLD	2017_05_4	a	1350	15	0.02718	3.94e+07	2.1704e+06				3.75241e+11	4.39812e+10
15-OTW-057-OLD	2017_05_6	b	1275	15	0.04032	1.073e+10	1.59673e+08	1.0759e+10	1.5968e+08	1.48415	6.38958e+13	7.68958e+11	6.40934e+13	7.70728e+11
15-OTW-057-OLD	2017_05_6	b	1350	15	0.04032	2.8959e+07	1.47319e+06				1.97616e+11	5.22046e+10
15-OTW-058-OLD	2017_05_4	a	1275	15	0.02325	1.23943e+10	1.87516e+08	1.24165e+10	1.87524e+08	1.51028	1.58259e+14	2.26906e+12	1.58481e+14	2.26981e+12
15-OTW-058-OLD	2017_05_4	a	1350	15	0.02325	2.22274e+07	1.74206e+06				2.21781e+11	5.84347e+10
15-OTW-058-OLD	2019_01_10	b	1225	15	0.0608	1.23481e+10	5.79016e+08	1.24258e+10	5.7903e+08	4.65992	138754407074102	4.24367e+12	1.39721e+14	4.2438e+12
15-OTW-058-OLD	2019_01_10	b	1325	15	0.0608	7.76735e+07	4.04939e+06				9.66362e+11	3.31474e+10
15-OTW-059-OLD	2017_05_4	a	1275	15	0.0196	9.60799e+09	1.45668e+08	9.61562e+09	1.45674e+08	1.51498	2.5439e+14	3.57482e+12	2.54494e+14	3.5758e+12
15-OTW-059-OLD	2017_05_4	a	1350	15	0.0196	7.63159e+06	1.39044e+06				1.04298e+11	8.39256e+10
15-OTW-060-OLD	2017_05_4	a	1275	15	0.01895	1.17147e+10	2.32455e+08	1.17297e+10	2.32461e+08	1.98181	1.20908e+14	2.74709e+12	1.2101e+14	2.74777e+12
15-OTW-060-OLD	2017_05_4	a	1350	15	0.01895	1.50431e+07	1.63866e+06				1.0221e+11	6.11349e+10
