# Supplementary material for: East Antarctic Ice Sheet variability in the central Transantarctic Mountains since the mid Miocene
Source: Copernicus journal article supplement (doi:10.5194/cp-21-145-2025), 2025-01-21
Supplement: Supplementary file 2 [file Table S1.xlsx]

## Sheet: He-3, Be-10, Ne-21 data
Table S1. He-3 exposure ages for dolerite boulders and Ne-21 and Be-10 exposure ages for sandstone boulders.
Sample ID	Nuclide	No. of Measurements	Age (Ma)	Error (Ma)	Outlier	Elimination method/Notes
MOG Moraine
15-OTW-001-MOG	He-3	1	3.63355	0.10546
15-OTW-002-MOG	He-3	2	0.981569	0.028563
15-OTW-003-MOG	He-3	2	2.11214	0.061342
15-OTW-004-MOG	He-3	1	2.92749	0.084985
15-OTW-005-MOG	He-3	1	1.65834	0.048438
15-OTW-006-MOG	He-3	2	1.26201	0.037972
15-OTW-007-MOG	He-3	2	2.37197	0.068876
15-OTW-008-MOG	He-3	1	1.55475	0.050956
15-OTW-009-MOG	He-3	2	2.13355	0.061964
15-OTW-010-MOG	He-3	1	0.959849	0.028643
15-OTW-011-MOG	Be-10	1	1.08825	0.016659
15-OTW-011-MOG	Ne-21	2	1.62841	0.027211		Complex exposure
15-OTW-012-MOG	Be-10	1	1.61484	0.03466		Complex exposure
15-OTW-012-MOG	Ne-21	2	2.58508	0.033952		Complex exposure
15-OTW-013-MOG	Be-10	1	1.92446	0.04508		Complex exposure
15-OTW-013-MOG	Ne-21	2	5.36053	0.06048		Complex exposure
DUT Moraine
15-OTW-014-DUT	He-3	2	1.44355	0.041955
15-OTW-015-DUT	He-3	1	1.67034	0.049923
15-OTW-016-DUT	He-3	2	3.45887	0.100394
15-OTW-017-DUT	He-3	1	2.75118	0.081863
15-OTW-018-DUT	He-3	1	4.8641	0.141146	x	Stratigraphic outlier
15-OTW-019-DUT	He-3	1	4.63977	0.134638	x	Stratigraphic outlier
15-OTW-020-DUT	He-3	1	3.0938	0.089808
15-OTW-021-DUT	He-3	2	3.65698	0.10614
15-OTW-022-DUT	He-3	1	1.70833	0.055035
JOS Moraine
15-OTW-023-JOS	He-3	1	3.00407	0.095746
15-OTW-024-JOS	He-3	2	2.76662	0.080318
15-OTW-025-JOS	He-3	1	1.99396	0.057913
15-OTW-026-JOS	He-3	1	3.30017	0.1049
15-OTW-027-JOS	He-3	1	3.92809	0.125034
15-OTW-028-JOS	He-3	1	3.28865	0.104977
15-OTW-031-JOS	He-3	1	2.61999	0.076067
15-OTW-032-JOS	He-3	1	1.91176	0.060321
MON Moraine
15-OTW-034-MON	He-3	1	7.95147	0.248999
15-OTW-035-MON	He-3	1	7.43428	0.236111
15-OTW-036-MON	He-3	1	2.05228	0.065074
15-OTW-037-MON	He-3	2	2.90906	0.08445
15-OTW-038-MON	He-3	1	2.81421	0.091618
15-OTW-039-MON	He-3	1	6.01727	0.174585
15-OTW-040-MON	He-3	2	2.2435	0.06515
CHA Moraine
15-OTW-043-CHA	He-3	1	6.97648	0.202401
15-OTW-044-CHA	He-3	1	8.85495	0.256876
15-OTW-045-CHA	He-3	2	7.05301	0.204621
15-OTW-046-CHA	He-3	2	7.81301	0.22666
15-OTW-047-CHA	He-3	1	6.72705	0.195168
15-OTW-048-CHA	He-3	3	8.51851	0.247121
15-OTW-049-CHA	He-3	3	8.3926	0.24347
15-OTW-050-CHA	He-3	2	9.39922	0.27266
15-OTW-051-CHA	He-3	5	8.14231	0.236211
15-OTW-052-CHA	He-3	1	7.51447	0.218002
OLD drift
15-OTW-053-OLD	He-3	1	9.55659	0.277223
15-OTW-054-OLD	He-3	1	9.25936	0.268603
15-OTW-055-OLD	He-3	2	9.49198	0.27535
15-OTW-056-OLD	He-3	4	9.08453	0.263534
15-OTW-057-OLD	He-3	2	9.2345	0.267882
UPP drift
15-OTW-058-UPP	He-3	2	9.02514	0.261799
15-OTW-059-UPP	He-3	1	6.93562	0.201202	x	Stratigraphic outlier
15-OTW-060-UPP	He-3	1	8.5156	0.247022	x	Stratigraphic outlier
