# Supplementary material for: East Antarctic Ice Sheet variability in the central Transantarctic Mountains since the mid Miocene
Source: Copernicus journal article supplement (doi:10.5194/cp-21-145-2025), 2025-01-21
Supplement: Supplementary file 4 [file Table S3.xlsx]

## Sheet: Sheet1
Table S3. Be-10 and Al-26 concentrations in quartz from sandstone erratics from Otway Massif.
	Mass	Mass Be-9	Be-10/Be-9		LLNL/CAMS	Be-10 process blank		Be-10 concentration		Total Al-27 (incl. carrier)		Al-26/Al-27		Al-26 concentration		LLNL/CAMS
Sample name	quartz (g)	carrier (mg)	ratio	+/-	AMS ID (Be)	(atoms)	+/-	(atoms/g)	+/-	(mg)	+/-	ratio	+/-	(atoms/g)	+/-	AMS ID (Al)	Chem lab
Otway Massif moraine sequence
15-OTW-011-MOG	5.6853	0.247865	1.11896e-11	6.39073e-14	BE43112	74021.2	6236.67	3.25854e+07	375406								Maine
15-OTW-012-MOG	1.2699	0.268737	3.07636e-12	2.99179e-14	BE43895	23325.8	5866.02	4.34842e+07	606839	2.60781	0.0810032	4.03099e-12	1.0575e-13	1.84764e+08	7.51212e+06	AL14037	LLNL
15-OTW-013-MOG	0.9851	0.264245	2.71616e-12	2.6346e-14	BE43896	23325.8	5866.02	4.8662e+07	678287	2.17992	0.0819797	3.19089e-12	6.01677e-14	1.57606e+08	6.63034e+06	AL14038	LLNL
CRONUS-A quartz standard
A-STD-201709	1.4249	0.264673	2.81353e-12	2.55394e-14	BE43899	23325.8	5866.02	3.49054e+07	471653	1.53032	0.0103562	6.23349e-12	1.17527e-13	1.49427e+08	2.9933e+06	AL14041	LLNL
