# Supplementary material for: East Antarctic Ice Sheet variability in the central Transantarctic Mountains since the mid Miocene
Source: Copernicus journal article supplement (doi:10.5194/cp-21-145-2025), 2025-01-21
Supplement: Supplementary file 5 [file Table S4.xlsx]

## Sheet: Table S4A
Table S4A: Step-degassing Ne analyses for quartz from sandstone erratics at Otway Massif.
			Heating	Heating																Excess 21Ne5				Excess 21Ne as	Percent of total	Total
		Aliquot	temperature	time	Total 20Ne released1			Total 21Ne released2			Total 22Ne released3			21Ne / 20Ne4			22Ne / 20Ne4			This heating step				% of 21Ne released	excess 21Ne	excess 21Ne
Sample name	Aliquot	weight (g)	(deg C)	(hr)	(109 atoms)			(106 atoms)			(106 atoms)			(10-3)			(10-3)			(106 atoms g-1)				in this heating step	released in this step	(106 atoms g-1)
15-OTW-011-MOG	a	0.1027	850	0.25	3.5502	+/-	0.0621	38.115	+/-	0.844	385.173	+/-	6.353	10.524	+/-	0.107	105.8	+/-	0.8	267.42	+/-	6.44		72.0557	98.7336	270.85	+/-	6.48124
			1200	0.25	0.2497	+/-	0.0084	1.106	+/-	0.074	25.574	+/-	1.65	4.336	+/-	0.308	100	+/-	7.1	3.43	+/-	0.73		31.85	1.26638
	b	0.1072	850	0.25	3.3857	+/-	0.0475	38.533	+/-	0.606	372.275	+/-	5.695	11.119	+/-	0.115	107.4	+/-	0.8	264.42	+/-	4.83		73.5625	97.9878	269.85	+/-	4.89258
			1200	0.25	0.3799	+/-	0.0092	1.725	+/-	0.083	40.43	+/-	1.792	4.461	+/-	0.225	104.2	+/-	4.8	5.43	+/-	0.78		33.7447	2.01223
15-OTW-012-MOG	a	0.1176	850	0.25	4.2136	+/-	0.0729	63.396	+/-	1.311	479.31	+/-	7.632	14.747	+/-	0.087	110.9	+/-	0.6	431.94	+/-	9.12		80.1252	98.9689	436.44	+/-	9.15502
			1200	0.25	0.2856	+/-	0.0093	1.391	+/-	0.094	31.604	+/-	1.715	4.766	+/-	0.339	108.1	+/-	6.6	4.5	+/-	0.8		38.0446	1.03107
	b	0.1189	850	0.25	3.9201	+/-	0.0553	61.853	+/-	0.858	445.737	+/-	6.455	15.418	+/-	0.114	111	+/-	0.7	421.37	+/-	6.21		80.9999	99.0015	425.62	+/-	6.24604
			1200	0.25	0.3452	+/-	0.0096	1.544	+/-	0.077	36.784	+/-	1.815	4.393	+/-	0.238	104.3	+/-	5.5	4.25	+/-	0.67		32.7283	0.998543
15-OTW-013-MOG	a	0.1256	850	0.25	4.267	+/-	0.0719	126.684	+/-	2.561	560.566	+/-	8.6	29.138	+/-	0.177	128.1	+/-	0.7	908.35	+/-	18.52		90.0577	99.6118	911.89	+/-	18.5252
			1200	0.25	0.111	+/-	0.0064	0.779	+/-	0.053	12.653	+/-	1.571	6.866	+/-	0.591	111.4	+/-	15.1	3.54	+/-	0.44		57.0763	0.388205
	b	0.1225	850	0.25	3.6808	+/-	0.0534	117.492	+/-	1.513	494.637	+/-	6.927	31.197	+/-	0.197	131.2	+/-	0.8	870.21	+/-	11.35		90.7302	99.5846	873.84	+/-	11.3643
			1200	0.25	0.1398	+/-	0.0095	0.864	+/-	0.065	16.103	+/-	1.579	6.073	+/-	0.605	112.8	+/-	13.3	3.63	+/-	0.57		51.467	0.415408
1 Computed by comparison to 20Ne signal in air pipettes. 1-sigma uncertainty includes measurement uncertainty of 20Ne signal in this analysis and the reproducibility of the air pipette signal
2 Computed by comparison to 21Ne signal in air pipettes. 1-sigma uncertainty includes measurement uncertainty of 21Ne signal in this analysis and the reproducibility of the air pipette signal
3 Computed by comparison to 22Ne signal in air pipettes. 1-sigma uncertainty includes measurement uncertainty of 21Ne signal in this analysis and the reproducibility of the air pipette signal
4 Isotope ratio measured internally during each analysis: does not involve normalization to the Ne isotope signals in the air pipettes.
5 Computed by comparison of 21Ne signal to air pipettes.

## Sheet: Table S4B
Table S4B. Nucleogenic 21Ne correction for Otway Massif quartz samples. Assumes average nucleogenic 21Ne concentration in Roberts Massif sandstones (Balter-Kennedy et al., 2020).
		Total excess 21Ne concentration				Resulting cosmogenic		Relative
		Individual aliquots		Error-weighted mean		21Ne concentration		size of		Wi	WiXi
Sample name	aliquot	(Matoms/g)	+/-	(Matoms/g)	+/-	(Matoms/g)	+/-	correction (%)
15-OTW-011-MOG	a	270.85	6.48124	270.213	3.90489	259.763	4.7876	3.86732		0.0238058	6.44781
	b	269.85	4.89258							0.0417758	11.2732
15-OTW-012-MOG	a	436.44	9.15502	429.057	5.1596	418.607	5.85614	2.43558		0.0119311	5.20722
	b	425.62	6.24604							0.0256325	10.9097
15-OTW-013-MOG	a	911.89	18.5252	884.244	9.68686	873.794	10.0751	1.1818		0.00291389	2.65715
	b	873.84	11.3643							0.00774309	6.76622
